# Supplementary material for: Photophysical and optoelectronic studies of 1.06 and 13.3 μm emissive neodymium complexes
Source: Royal Society of Chemistry journal article supplement (doi:10.1039/d4nj03842h), 2024-01-01
Supplement: d4nj03842h1.pdf [file d4nj03842h1.pdf]

## Supplementary information

### Photo-physical and Opto-electronical Studies of 1.06 and 13.3 $\mu\text{m}$ Emissive Neodymium complexes

Zubair Ahmed,<sup>1,2\*</sup> Asgar Ali,<sup>3</sup> Faisal Imam,<sup>4</sup> Rafael S. Carvalho,<sup>5</sup> Marco Cremona<sup>5</sup>

<sup>1</sup>Department of Chemistry, School of Basic and Applied Sciences, Galgotias University, Greater Noida, India.  
[zubairchem011@gmail.com](mailto:zubairchem011@gmail.com).

<sup>2</sup>Institute of Organic Synthesis and Photoreactivity (ISOF), National Research Council of Italy (CNR), Bologna, 40129, Italy.

<sup>3</sup>Lanthanide Research Laboratory, Department of Chemistry, Jamia Millia Islamia, New Delhi 110025, India.

<sup>4</sup>Department of Pharmacology and Toxicology, College of Pharmacy, King Saud University, Riyadh 11451, Saudi Arabia.

<sup>5</sup>Department of Physics, Pontifical Catholic University of Rio de Janeiro, PUC-Rio, Rio de Janeiro, RJ 22453-970, Brazil.

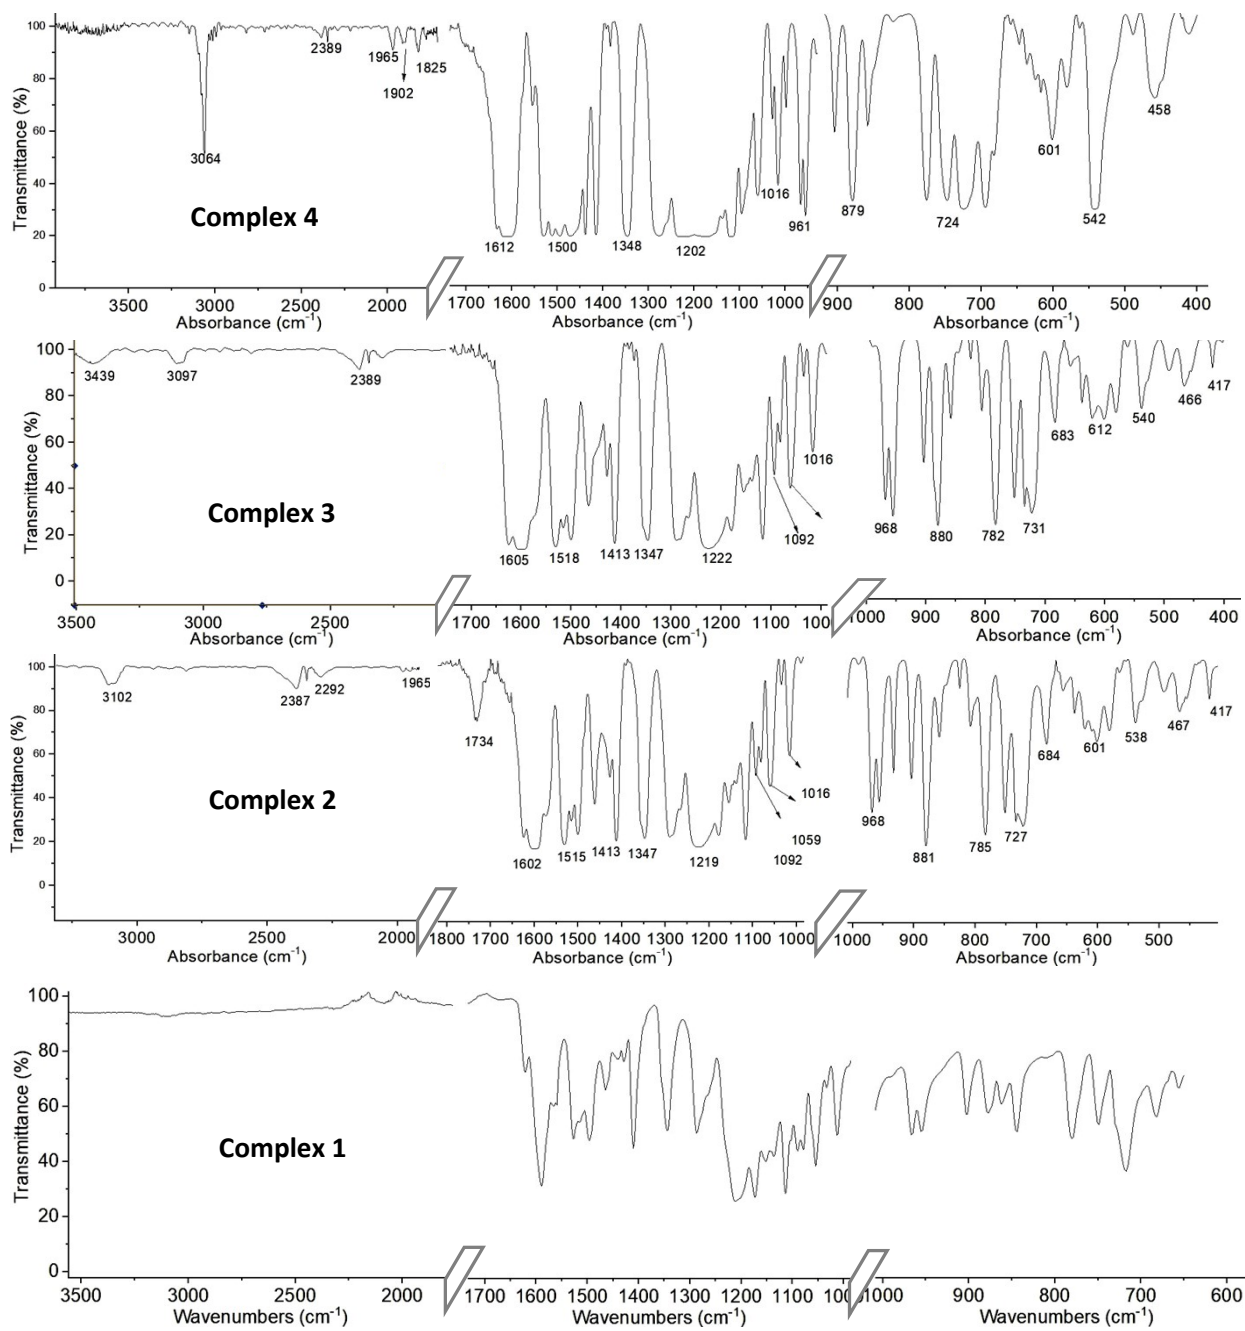

Fig. S1. FTIR spectra of the complexes, (1–4).

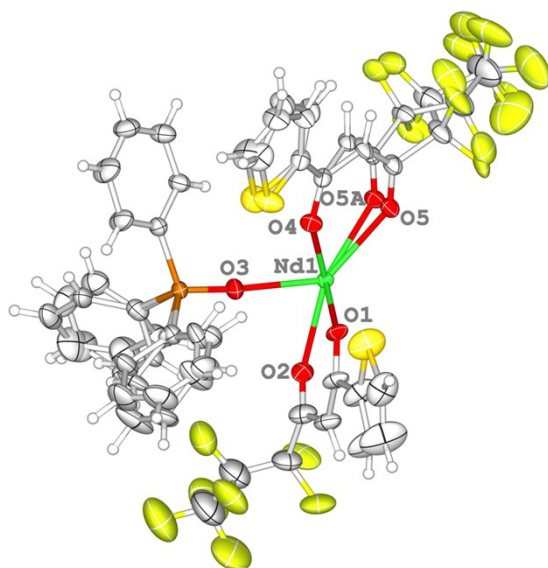

Fig. S2. ORTEP diagram drawn in 20% thermal probability ellipsoids showing asymmetric unit with partial atomic numbering scheme.

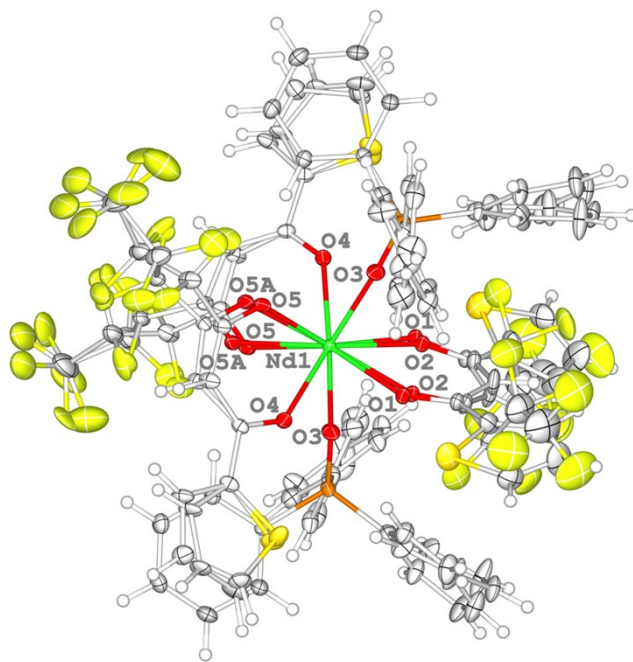

Fig. S3. ORTEP diagram of complete molecule showing partial atomic numbering scheme. Both the disordered components are drawn in 10% thermal probability ellipsoids for the sake of clarity.

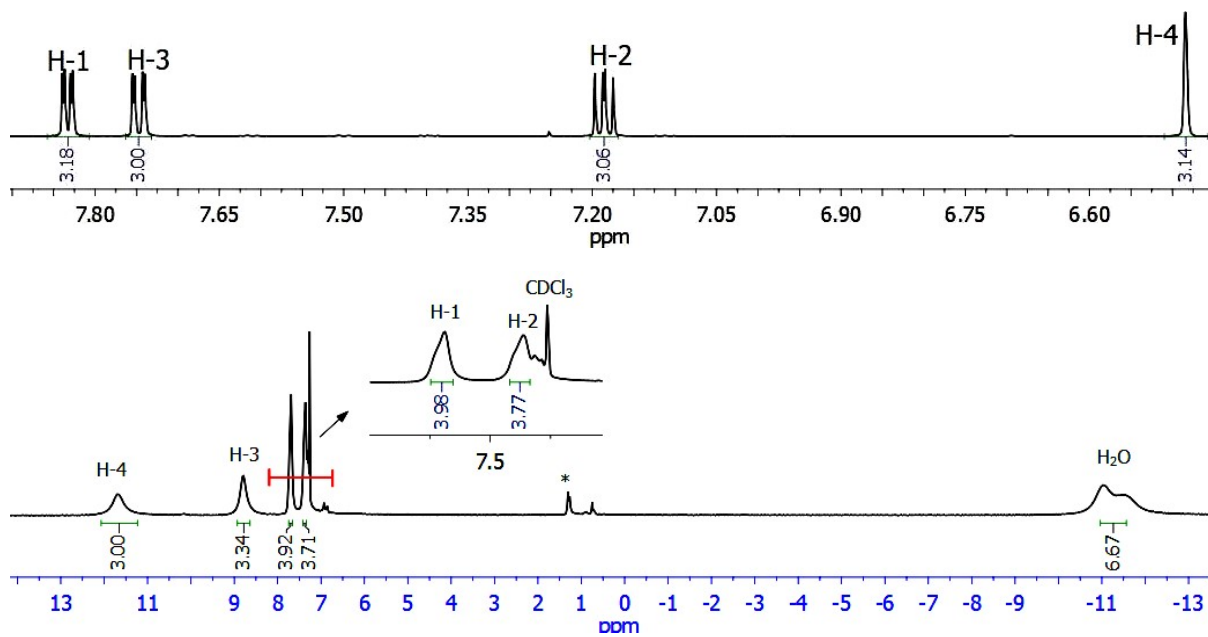

Fig. S4.  $^1\text{H}$  NMR spectra of the free hth and chelate in  $\text{CDCl}_3$ . Inset: resolution.

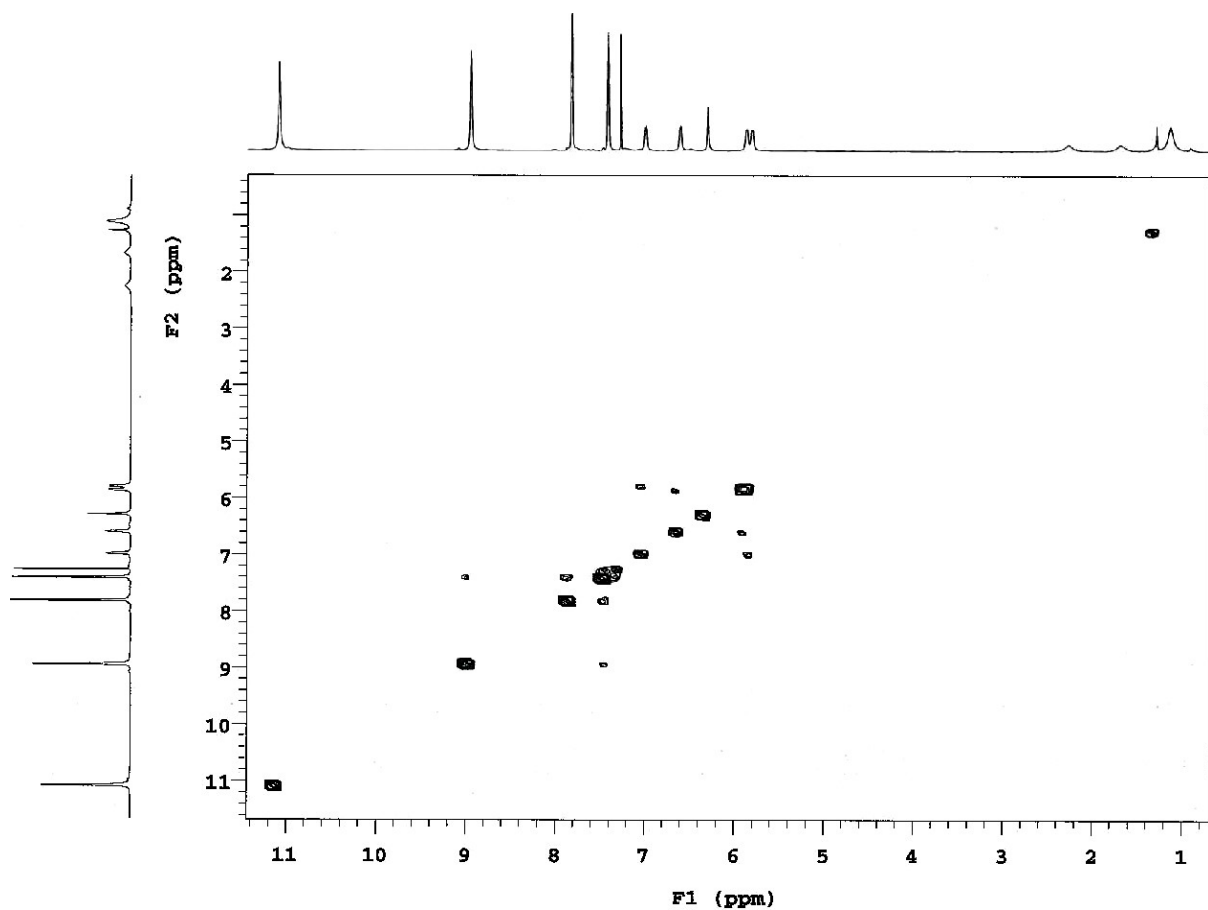

Fig. S5. COSY NMR spectrum of the complex **3** in  $\text{CDCl}_3$ .

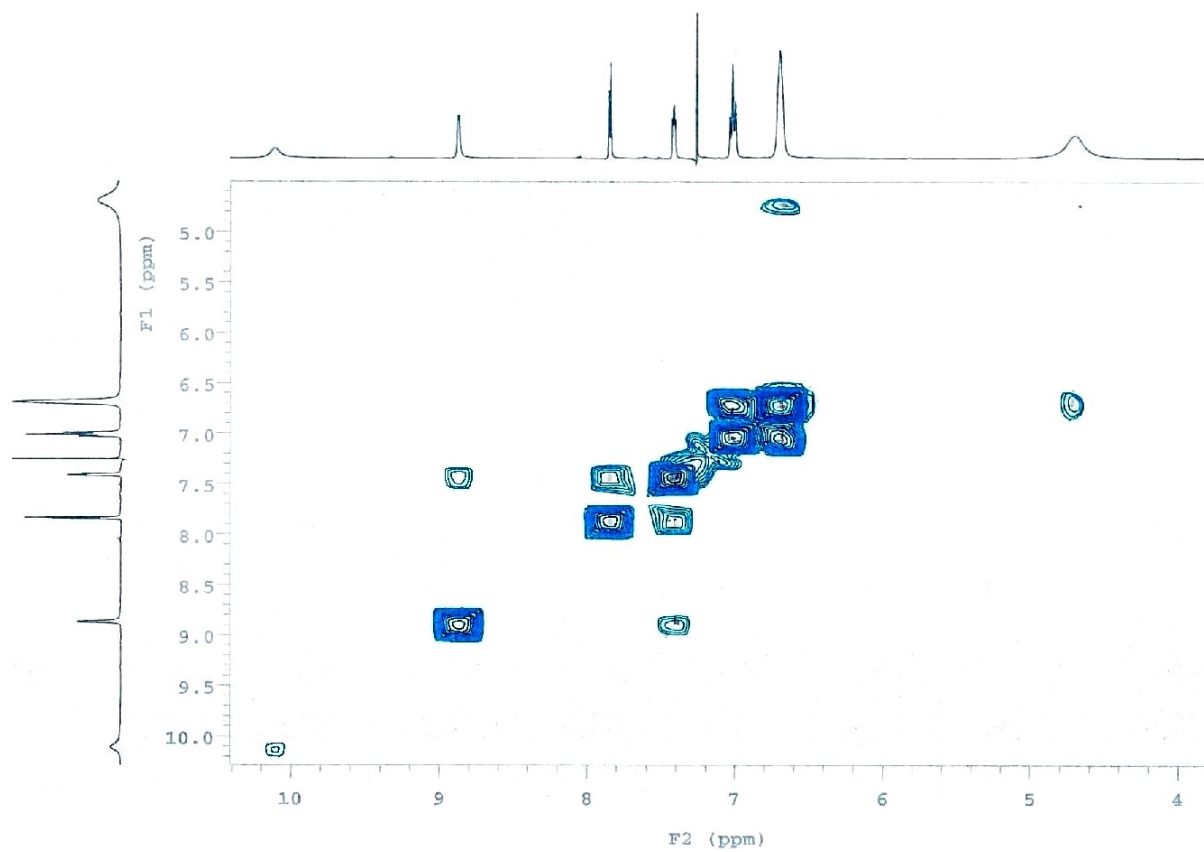

Fig. S6. COSY NMR spectrum of the complex 4 in CDCl<sub>3</sub>.

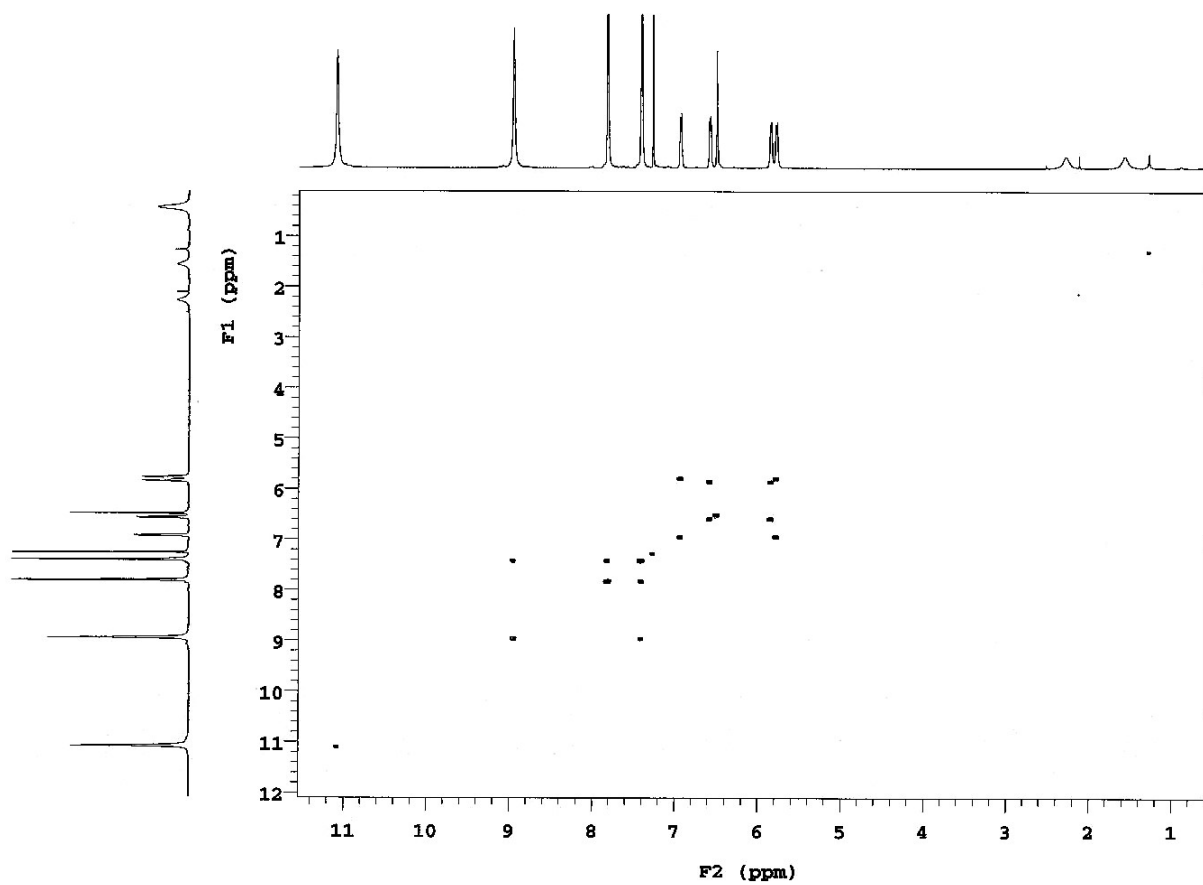

Fig. S7. COSY NMR spectrum of the complex 2 in CDCl<sub>3</sub>.

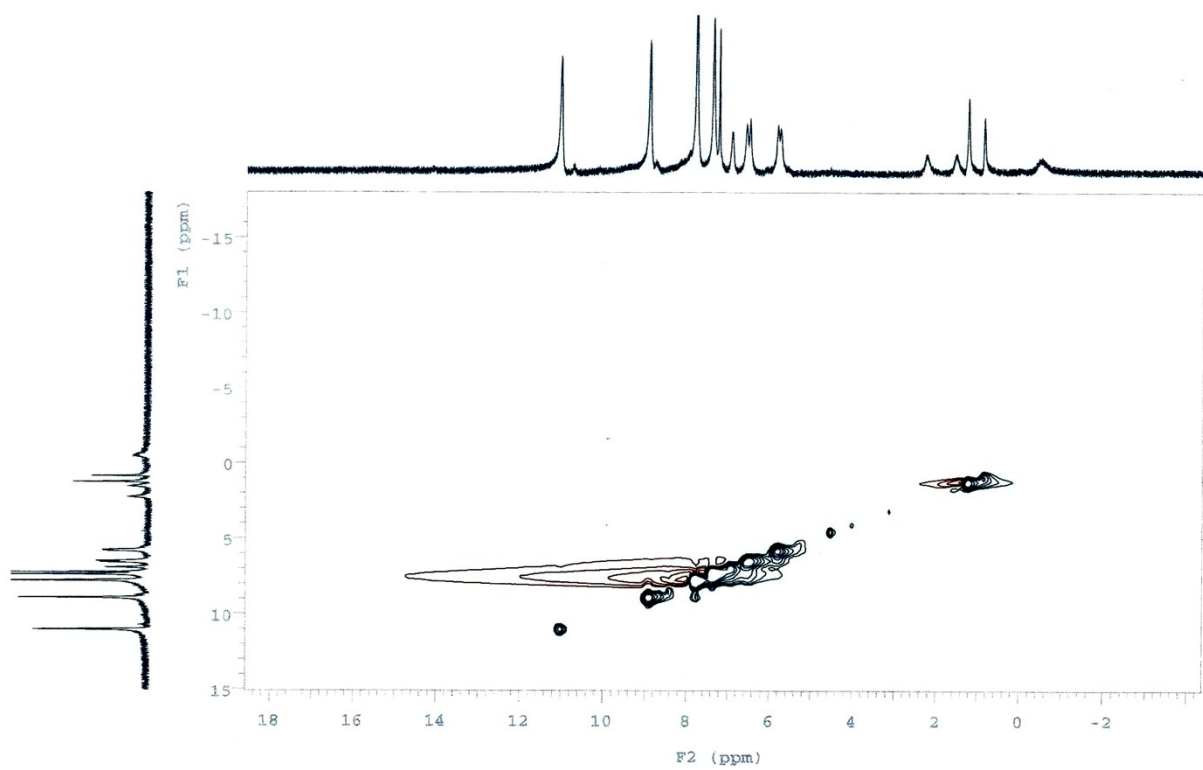

Fig. S8. NOESY NMR spectrum of the complex 1 in CDCl<sub>3</sub>.

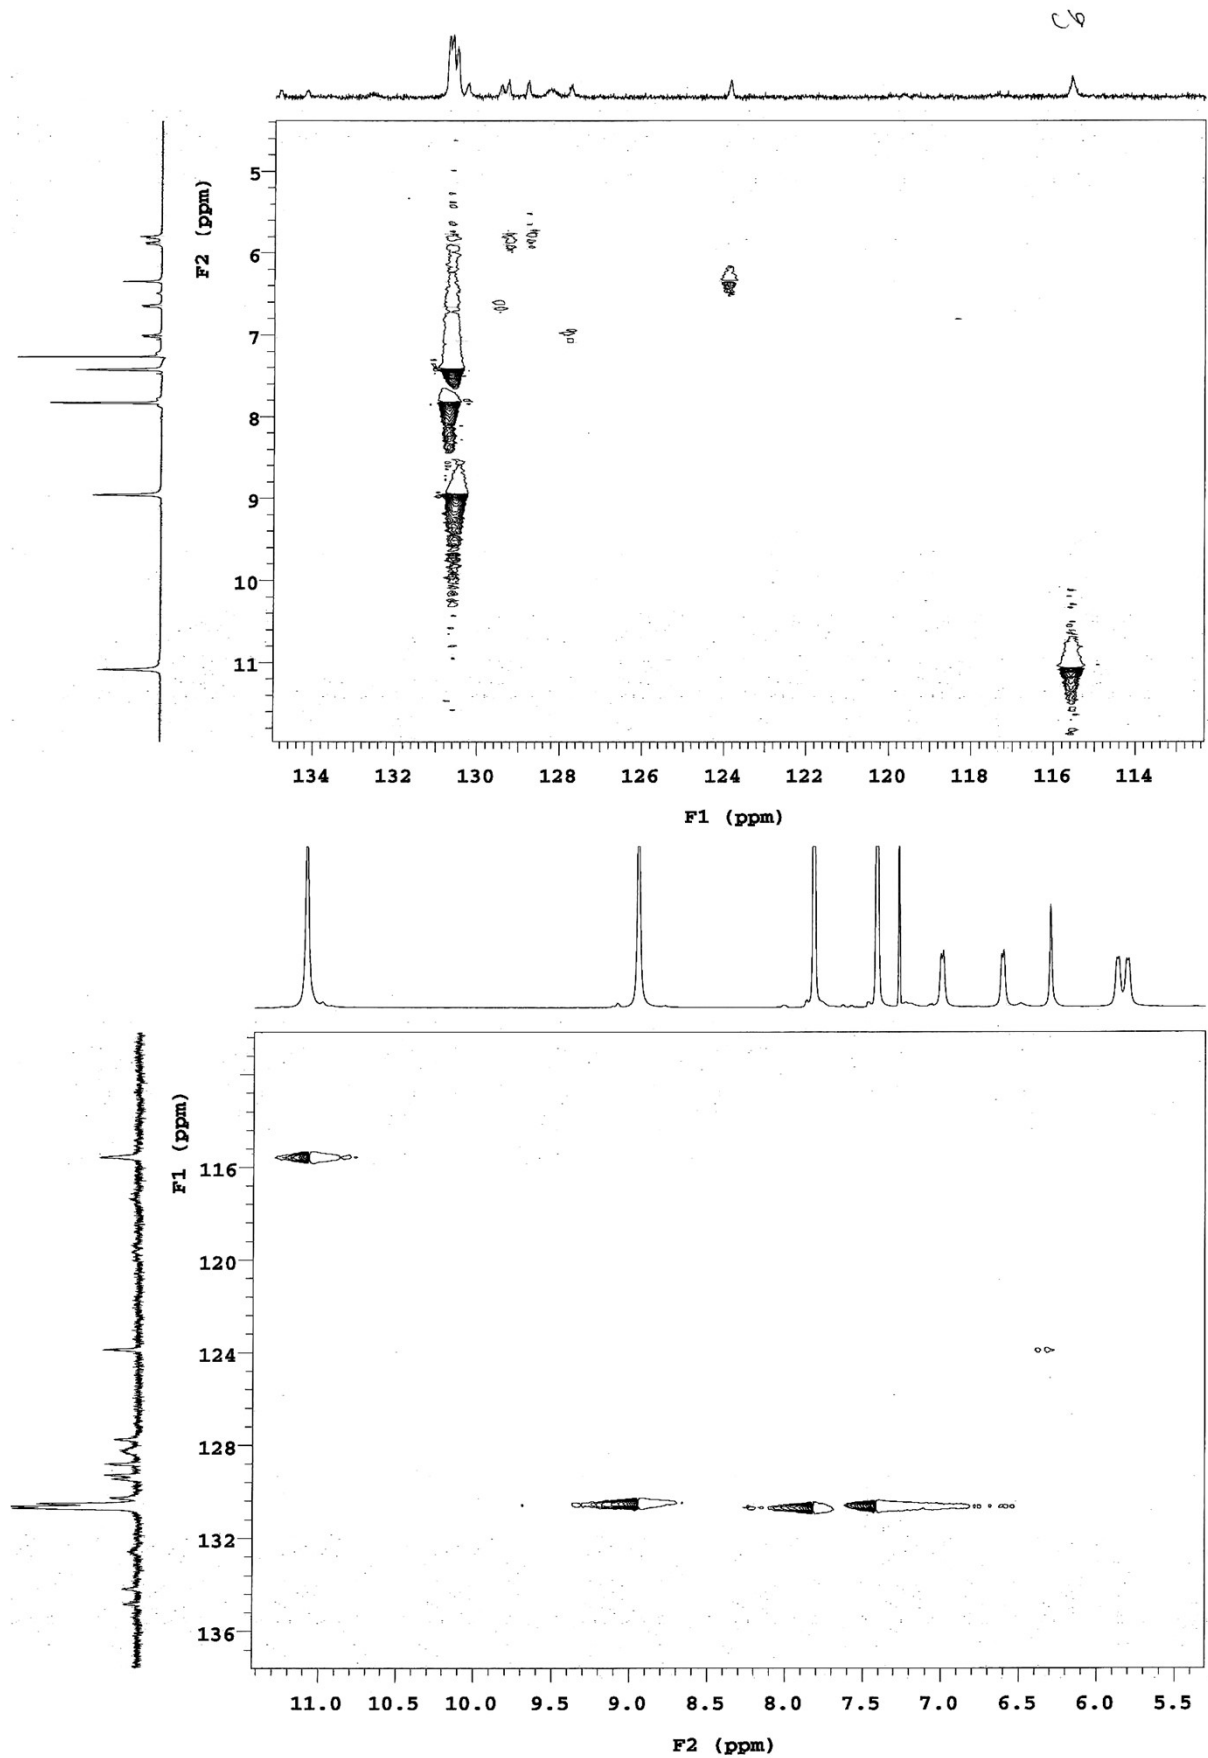

Fig.S9. HSQC NMR spectra of the complex 1 in CDCl<sub>3</sub>.

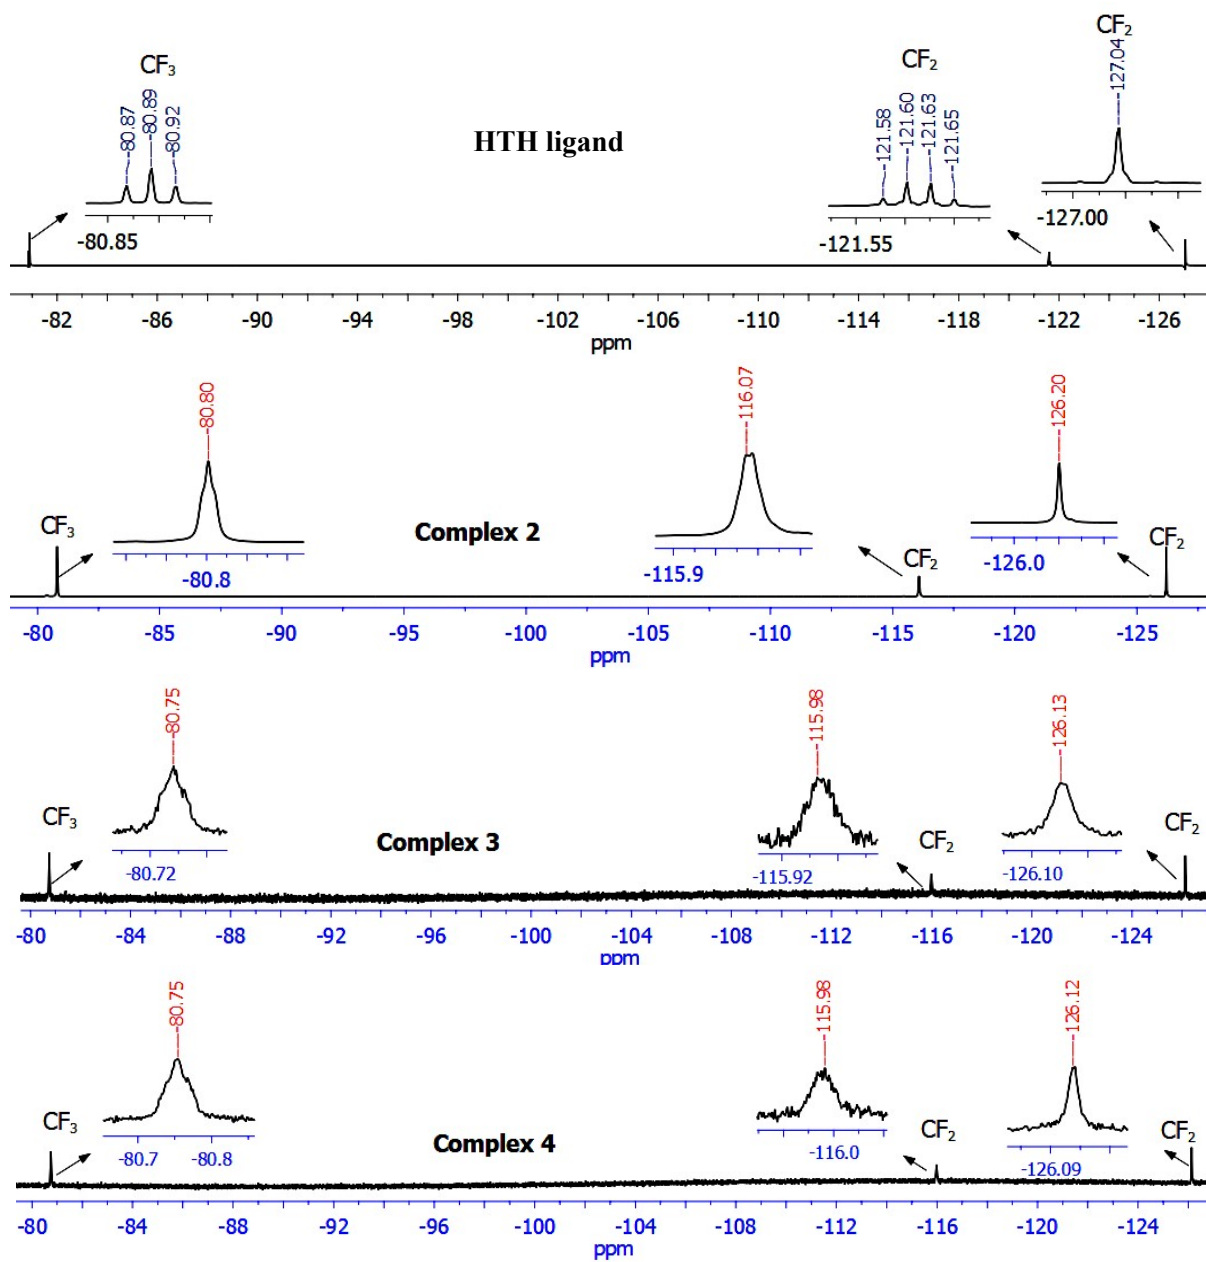

Fig. S10.  $^{13}\text{F}$  NMR spectra of the free hth ligand and the complexes in  $\text{CDCl}_3$ .



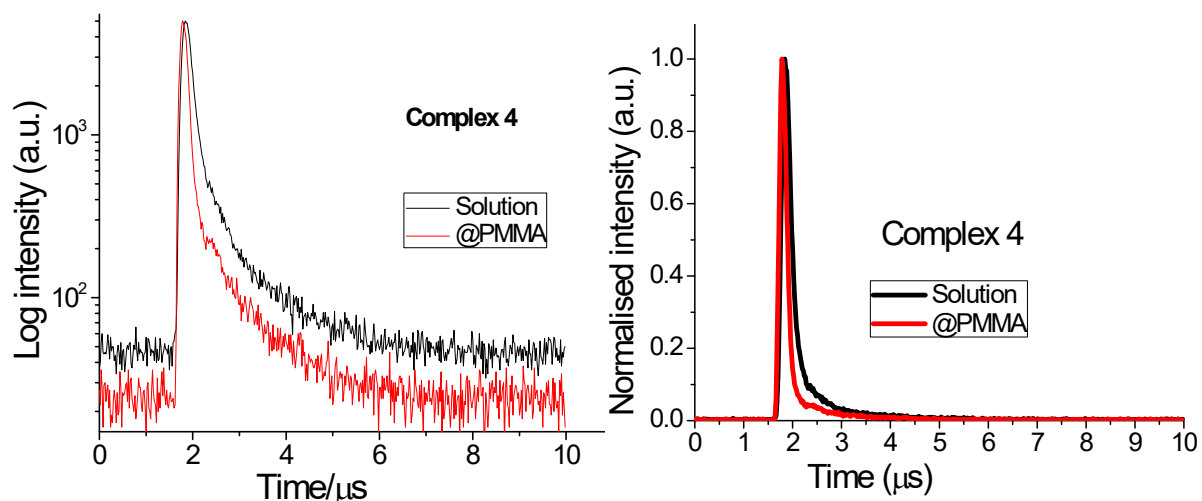

Fig. S11. Decay curves (left) and normalized curves (right) of the complexes in solution and solid state.

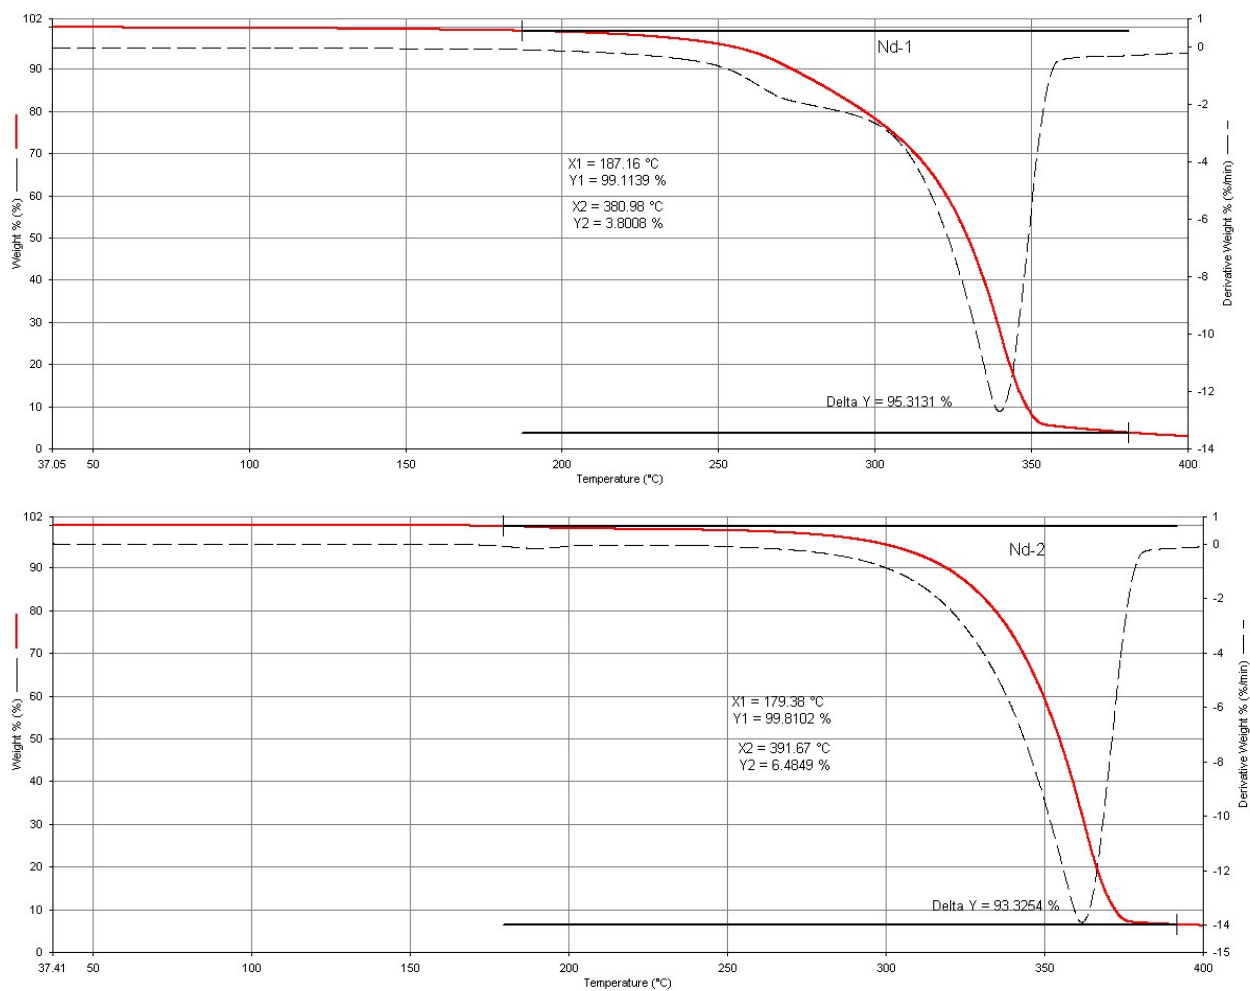

Fig. S12. TGA/DTA curves of the complexes).
